# Supplementary material
Source: PubMed Central journal article supplement (PMC5033879)

# Supplemental figure 1

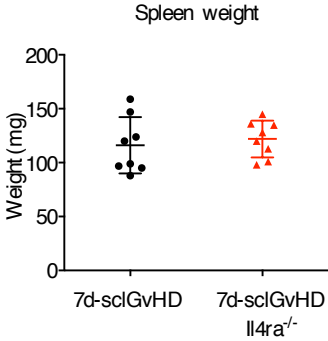

# Supplemental Figure 2

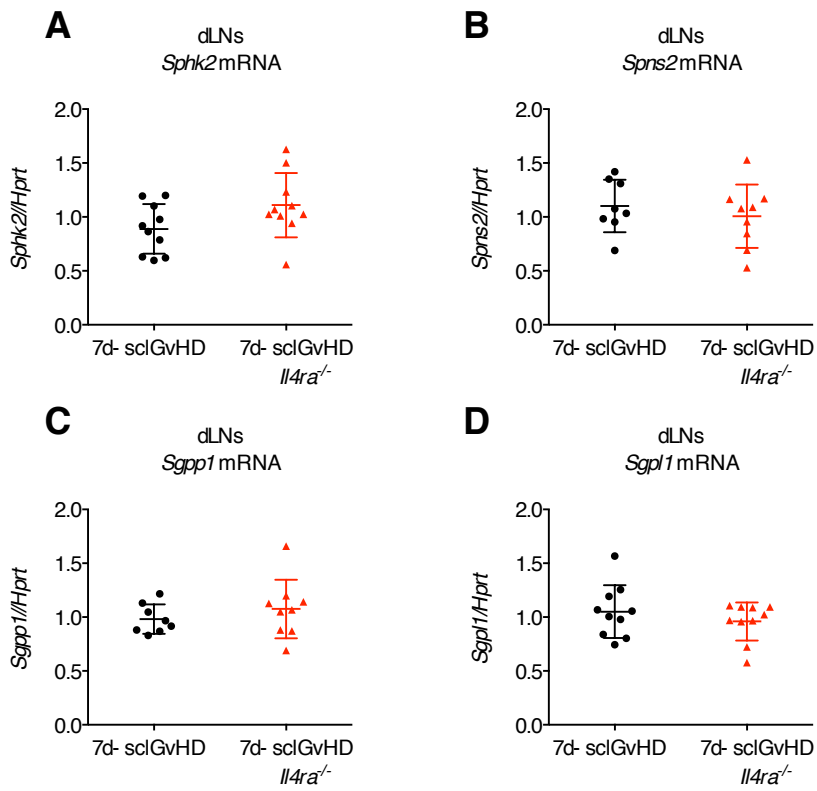

# Supplemental Figure 3

**A**

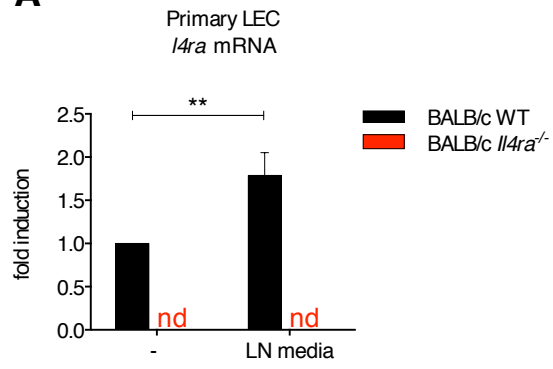

**B**

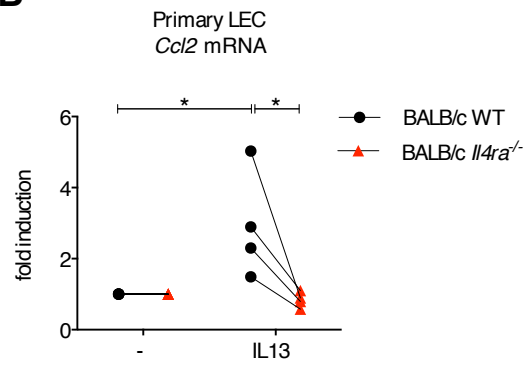

# Supplemental Figure 4

dLNs  
Live gate, CD4<sup>+</sup>

B10.D2  
T<sub>naïve</sub> cells

7d-sclGvHD *Il4ra*<sup>-/-</sup>  
T<sub>EM</sub> cells

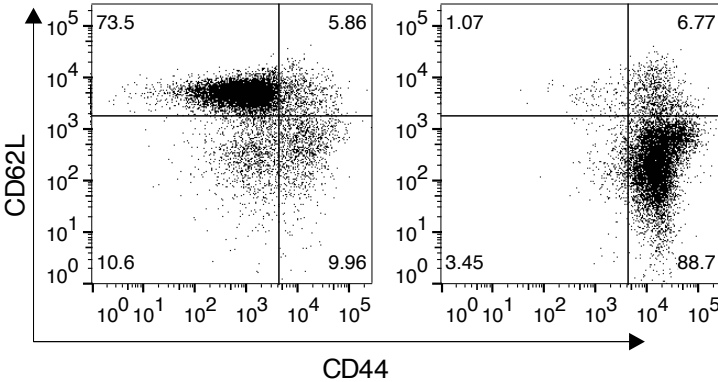

Supplement: jciinsight-1-88057-s001.pdf [file jciinsight-1-88057-s001.pdf]
